# Supplementary material
Source: PubMed Central journal article supplement (PMC2683335)
Supplement: NIHMS4830-supplement-Supp_fig_2.pdf [file NIHMS4830-supplement-Supp_fig_2.pdf]

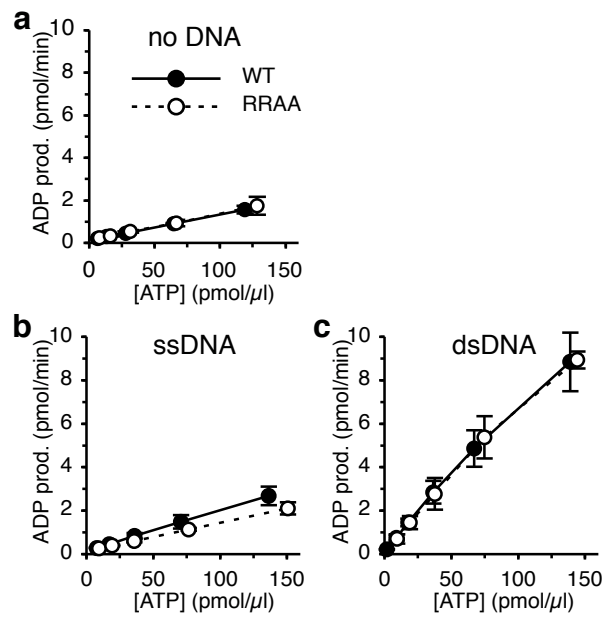

Jenkinson et al - Supplementary Figure 2: ATPase activity of WT and RRAA proteins  
 ATP hydrolysis of WT (closed circles, continuous line) and RRAA (open circles, broken line) *Mth*MCM (a) in the absence of DNA, (b) in the presence of closed circular ssDNA and (c) in the presence of closed circular dsDNA. These data indicate that ATP hydrolysis in the RRAA mutant protein is essentially WT. ATPase assay was carried out as described in Jenkinson & Chong (2006) *Proc Natl Acad Sci U S A* **103**, 7613-7618.
